# Supplementary material for: Zinc Deficiency and the Recurrence of Clostridium difficile Infection after Fecal Microbiota Transplant: A Retrospective Cohort Study
Source: J Nutr Metab. 2018 Oct 10;2018:9682975. doi: 10.1155/2018/9682975 (PMC6199870; doi:10.1155/2018/9682975)
Supplement: Supplementary Materials — Table S1: Cox regression output for full cohort. Table S2: Cox regression output for low zinc cohort. [file 9682975.f1.zip]

Archive with 2 entries (2 files):
- Revised Supplementary Tables.docx
- S1 Data.xls
