# Supplementary material for: Zinc Deficiency and the Recurrence of Clostridium difficile Infection after Fecal Microbiota Transplant: A Retrospective Cohort Study
Source: J Nutr Metab. 2018 Oct 10;2018:9682975. doi: 10.1155/2018/9682975 (PMC6199870; doi:10.1155/2018/9682975)
Supplement: Supplementary Materials — Table S1: Cox regression output for full cohort. Table S2: Cox regression output for low zinc cohort. [file 9682975.f1.zip › S1 Data.xls]

## Sheet: Sheet1
Age	Gender (0=Female, 1=Male)	Zinc	Zinc_Low	Days_b/w_Zn_FMT	Days_b/w_Supp_FMT	Supplement	CDI_total	CDI_6mo	CDI_hosp	CDI_hosp_6mo	IBD	PPI	CKD	BMI	Albumin	Low_albumin	WBC	High_WBC	CRP	High_CRP	ESR	High_ESR	Hosp_win_90	Surg_win_90	FMT_Failure	Days_until_CDI recurrence	Censored	Reason	Days until CDI recurrence or Censor	Immunocompromised	HIV	AIDS-defining diagnosis or CD4 < 200	Inherited or primary immune disorders	Immusuppression medication	MI	CHF	PVD	CVA	Dementia	Chronic Pulmonary Disease	Connective Tissue Disease	PUD	Mild Liver Dz	DM w/o EO damage	Hemiplegia	Mod or severe renal dz	DM w EO damage	Tumor w/o mets	Leukemia
59	1	0.97	0	11		0	3	3	1	1	0	1	0	22.4	4.2	0	8.67	0	0.2	0	12	0	0	0	0		1	Incomplete	90	0	0	0	0	0	0	0	0	0	0	0	0	0	0	0	0	0	0	0	0
42	1	0.77	0	4		0	3	2	0	0	0	1	0	41.44	4.5	0	11.05	1					0	0	0		1	Incomplete	90	0	0	0	0	0	0	0	0	0	0	1	0	0	0	0	0	0	0	0	0
50	1	0.68	0	6		0	3	3	1	1	0	0	0	32.82	4.5	0	9.27	0	0.5	1	38	1	1	0	0		1	Incomplete	29	0	0	0	0	0	0	0	0	0	0	0	0	0	0	0	0	0	0	0	0
74	1	0.7	0	4		0	3	3	0	0	0	0	0	22.68	4.1	0	6.18	0	0.2	0	15	0	0	0	0		1	Incomplete	90	0	0	0	0	0	0	0	0	0	0	0	0	0	0	0	0	0	0	0	0
27	1	0.73	0	39		0	4	1	0	0	0	1	0	39.99	4.6	0	12.05	1	1.8	1	19	0	0	0	0		1	Incomplete	90	0	0	0	0	0	0	0	0	0	0	0	0	0	0	0	0	0	0	0	0
67	1	0.73	0	13		0	5	3	1	0	0	0	1	46.06									0	0	0		1	Incomplete	90	1	0	0	0	1	0	0	0	0	0	1	0	0	0	0	0	0	0	0	0
72	1	0.66	0	4		0	2	2	1	1	0	1	0	24.15	3.9	0	5.74	0	0.3	0	9	0	1	0	0		1	Incomplete	90	0	0	0	0	0	0	0	0	0	0	0	0	0	0	0	0	0	0	0	0
64	1	0.9	0	11		0	3	2	0	0	0	0	0	33.04	4.2	0	8.66	0	3.4	1	45	1	0	0	0		1	Incomplete	90	0	0	0	0	0	0	0	0	0	0	0	0	0	0	0	0	0	0	0	0
86	1	0.66	0	34		0	3	2	0	0	0	0	0	29.49	4.3	0	8.49	0					0	0	0		1	Incomplete	90	0	0	0	0	0	0	0	0	0	0	0	0	0	0	0	0	0	0	0	0
86	1	0.67	0	25		0	4	4	0	0	0	0	0	24.9	4.1	0	8.17	0			10	0	0	0	0		1	Incomplete	90	0	0	0	0	0	0	0	0	0	0	0	0	0	0	0	0	0	0	0	0
87	1	0.92	0	11		0	5	0	4	0	0	0	1	24.41	3.7	0	7.08	0	0.2	0	45	1	0	0	0		1	Incomplete	90	0	0	0	0	0	0	0	0	0	0	1	0	0	0	0	0	0	0	0	0
90	1	0.74	0	13		0	3	3	3	3	0	0	0	27.62	3.8	0	9.38	0	0.4	0	16	0	1	0	0		1	Incomplete	90	0	0	0	0	0	0	0	0	1	0	0	0	0	0	0	0	0	0	0	0
79	1	0.67	0	5		0	4	1	1	0	0	0	0	22.23	4	0	13.69	1	0.1	0	10	0	0	0	0		1	Incomplete	90	0	0	0	0	0	0	0	0	0	0	0	0	0	0	0	0	0	0	0	0
33	1	0.79	0	48		0	4	4	1	1	0	1	0	22.1	4.6	0	6.75	0	< 0.1	0	5	0	0	0	0		1	Incomplete	90	0	0	0	0	0	0	0	0	0	0	0	0	0	0	0	0	0	0	0	0
75	1	0.76	0	11		0	3	3	3	3	0	0	0	35.12	3.8	0	10.83	0	0.2	0	16	0	1	0	0		1	Incomplete	90	0	0	0	0	0	0	0	0	1	1	0	0	0	0	1	0	0	0	0	0
53	1	0.9	0	7		0	4	2	2	0	0	0	0	36.17									1	0	0		1	Incomplete	90	0	0	0	0	0	0	0	0	0	0	0	0	0	0	0	0	0	0	0	0
81	1	0.77	0	4		0	3	2	2	1	0	0	0	21.41									1	0	0		1	Incomplete	90	0	0	0	0	0	0	0	0	0	0	1	0	0	0	0	0	0	0	0	0
85	1	0.96	0	6		0	7	5	1	1	0	0	0	17.22	3.6	0	6.7	0	0.1	0	11	0	1	0	1	6	0	rCDI	6	0	0	0	0	0	1	1	0	0	0	0	0	0	0	0	0	0	0	0	0
79	1	0.77	0	20		0	3	2	1	0	0	0	0	31.72	4.4	0	9.19	0	2.5	1	47	1	0	0	0		1	Incomplete	90	1	0	0	0	1	0	0	0	0	0	1	0	0	0	0	0	0	0	0	0
59	0	0.72	0	34		0	4	4	3	3	0	1	0	22.03	4	0	4.44	0	0.2	0	14	0	1	0	0		1	Incomplete	90	0	0	0	0	0	1	0	0	0	0	0	0	0	0	0	0	0	0	0	0
63	0	0.73	0	67		0	6	4	0	0	0	0	0	23.89	4.1	0							0	0	0		1	Incomplete	90	0	0	0	0	0	0	0	0	0	0	0	0	0	0	0	0	0	0	0	0
68	1	0.69	0	20		0	3	3	0	0	0	0	0	26.48	3.5	0	7.65	0	0.7	1	19	0	0	0	0		1	Incomplete	90	0	0	0	0	0	0	0	0	0	0	0	0	0	0	0	0	0	0	0	0
59	1	0.7	0	6		0	4	4	0	0	0	0	0	37.58	3.9	0	9.89	0			41	1	0	0	0		1	Incomplete	90	0	0	0	0	0	0	0	0	0	0	1	1	0	0	0	0	0	0	0	0
91	1	0.72	0	4		0	3	3	2	2	0	0	0	18.71					2.1	1	41	1	1	0	0		1	Incomplete	90	0	0	0	0	0	0	0	0	0	0	0	0	0	0	0	0	0	0	0	0
65	1	0.71	0	4		0	3	3	2	2	0	0	0	20.35	3.9	0			0.7	1	38	1	0	0	1	88	0	rCDI	88	0	0	0	0	0	0	0	0	0	0	1	0	0	0	1	0	0	0	0	0
80	1	0.77	0	13		0	4	4	3	3	0	0	0				10.75	0	0.1	0	32	1	1	0	0		1	Incomplete	90	0	0	0	0	0	0	0	0	0	0	0	0	1	0	0	0	0	0	0	0
60	1	0.91	0	1		0	3	3	0	0	0	0	0	26	4.2	0	6.76	0					0	0	0		1	Incomplete	90	0	0	0	0	0	0	0	0	0	0	0	0	0	0	0	0	0	0	0	0
54	1	0.71	0	20		0	4	4	0	0	0	1	0	24.39					0.1	0	10	0	0	0	0		1	Incomplete	90	0	0	0	0	0	0	0	0	0	0	0	0	1	0	0	0	0	0	0	0
58	0	0.73	0	32		0	5	5	0	0	0	0	0	25.61					< 0.1	0	4	0	0	0	0		1	Incomplete	90	0	0	0	0	0	1	0	0	0	0	0	0	0	0	0	0	0	0	0	0
72	1	0.9	0	0		0	3	3	3	3	0	0	0		3.7	0							1	0	0		1	Incomplete	90	0	0	0	0	0	0	0	1	1	1	0	0	0	0	1	0	0	0	0	0
65	1	0.73	0	6		0	3	1	1	0	0	0	0	25.34					< 0.1	0	10	0	0	0	0		1	Incomplete	90	0	0	0	0	0	0	0	0	0	1	0	0	0	0	0	0	0	0	0	0
69	1	0.66	0	46		0	3	3	0	0	0	0	0	23.34	4.3	0	6.74	0	0.2	0	10	0	0	0	0		1	Incomplete	90	0	0	0	0	0	0	0	0	0	0	0	0	0	0	0	0	0	0	0	0
32	1	0.72	0	25		0	4	4	0	0	1	1	0	22.58							19	0	0	0	0		1	Incomplete	90	0	0	0	0	0	0	0	0	0	0	0	0	1	0	0	0	0	0	0	0
68	1	0.79	0	71		0	5	2	0	0	0	0	0	22.4									0	0	0		1	Incomplete	90	1	0	0	0	1	0	0	0	0	0	0	0	0	0	0	0	0	0	0	0
82	0	0.78	0	6		0	3	3	2	2	0	0	1		4.1	0	8.62	0	0.1	0	19	0	1	0	0		1	Incomplete	90	0	0	0	0	0	0	0	0	0	0	0	0	0	0	0	0	0	0	0	0
72	1	0.94	0	39		0	3	2	2	2	0	0	0	27.27	4.6	0	8.82	0	0.2	0	16	0	1	0	0		1	Incomplete	90	0	0	0	0	0	0	0	0	0	0	0	0	0	0	0	0	0	0	0	0
83	1	0.72	0	4		0	5	5	1	1	0	0	0	23.37	4.1	0	4.85	0	0.1	0	28	1	0	0	0		1	Death	90	0	0	0	0	0	0	0	0	0	0	0	0	0	0	0	0	0	0	0	0
32	1	0.71	0	18		0	5	4	2	1	0	0	1	24.34	3.5	0	4.2	0	0.4	0	56	1	1	0	1	72	0	rCDI	72	0	0	0	0	0	0	0	0	0	0	0	0	0	0	0	0	1	1	0	0
53	1	0.68	0	13		0	5	2	0	0	0	0	0	31.56	4.2	0	8.41	0	0.7	1	14	0	0	0	0		1	Incomplete	29	0	0	0	0	0	0	0	0	0	0	0	0	0	0	0	0	0	0	0	0
64	1	0.85	0	25		0	3	2	0	0	0	0	1	32.7	4.4	0	7.6	0	0.5	1	33	1	1	0	0		1	Incomplete	90	1	0	0	0	1	0	0	0	0	0	0	1	0	0	0	0	0	1	0	0
45	0	0.94	0	11		0	3	3	0	0	1	0	0	27.52	4.6	0	5.99	0	0.5	1	21	1	0	0	0		1	Incomplete	90	0	0	0	0	0	0	0	0	0	0	0	0	0	0	0	0	0	0	0	0
61	1	0.67	0	4		0	3	3	2	2	0	1	1	24.23	3.8	0	6.02	0	0.1	0	6	0	1	0	0		1	Incomplete	38	0	0	0	0	0	0	0	0	0	0	0	0	1	0	0	0	1	1	0	0
76	1	0.76	0	5		0	3	3	0	0	0	0	0	26.81	4.1	0	4.61	0	1.4	1	84	1	0	0	0		1	Incomplete	31	0	0	0	0	0	0	0	0	0	0	0	0	0	0	0	0	0	0	0	0
41	1	0.96	0	4		0	4	4	4	4	0	1	0	40.42	4.3	0	10.03	0	0.9	1	31	1	1	0	0		1	Incomplete	15	0	0	0	0	0	0	0	0	0	0	1	0	0	0	1	0	0	0	1	0
68	1	0.67	0	11		0	3	3	0	0	0	0	0	20.41	3.9	0	8.11	0	1	1	27	1	0	0	0		1	Incomplete	73	0	0	0	0	0	0	0	0	0	0	0	0	0	0	0	0	0	0	0	0
74	1	0.7	0	39		0	3	2	2	1	0	0	0	23.77	4.1	0			0.7	1	23	1	1	0	0		1	Incomplete	66	0	0	0	0	0	0	0	0	0	0	1	0	0	0	0	0	0	0	0	0
59	1	0.71	0	4		0	2	2	1	1	0	0	1	31.04	4.2	0	6.93	0	3.6	1	51	1	1	0	0		1	Incomplete	38	0	0	0	0	0	0	0	0	0	0	0	0	0	0	0	0	1	1	0	0
71	1	0.77	0	25		0	2	2	1	1	0	0	0	19.34	4	0	8.64	0	0.1	0	17	0	0	0	0		1	Incomplete	31	0	0	0	0	0	0	0	0	0	0	0	0	0	0	0	0	0	0	0	0
57	0	0.88	0	0		0	3	2	2	1	0	0	1	25.55	4	0							1	0	0		1	Incomplete	31	0	0	0	0	0	0	0	0	0	0	0	0	0	0	0	0	1	1	0	0
81	1	0.54	1	1		0	5	3	0	0	1	1	0	27.03			5.72	0	2.1	1			0	0	1	81	0	rCDI	81	1	0	0	0	1	0	0	0	0	0	0	0	0	0	0	0	0	0	0	0
37	0	0.59	1	4	3	1	4	2	0	0	1	0	0	27.4	3.6	0	5.22	0	1	1			0	0	0		1	Incomplete	90	1	0	0	0	1	0	0	0	0	0	0	0	0	0	0	0	0	0	0	0
88	1	0.53	1	27	-14	1	6	2	4	2	0	0	0	23.43	3.3	1	9.26	0	3.9	1	77	1	1	0	1	15	0	rCDI	15	0	0	0	0	0	0	0	0	0	0	0	1	0	0	0	0	0	0	0	0
28	1	0.53	1	1	8	1	3	2	0	0	1	0	0	20.19	3.8	0	5.01	0					0	0	0		1	Incomplete	90	1	0	0	0	1	0	0	0	0	0	0	0	0	0	0	0	0	0	0	0
77	1	0.45	1	11	-1	1	3	2	1	0	0	1	0	26.52	3.8	0	9.86	0	3.8	1	42	1	0	0	0		1	Incomplete	90	1	0	0	0	1	0	0	0	0	0	0	1	0	0	0	0	0	0	1	0
68	0	0.59	1	4	1	1	5	3	0	0	1	0	0	23.99	3.5	0	8.53	0	3.3	1	53	1	0	0	0		1	Incomplete	90	1	0	0	0	1	0	0	0	0	0	0	0	0	0	0	0	0	0	0	0
77	0	0.38	1	27	-20	1	6	6	0	0	1	0	0	31.84	2.7	1	7.72	0	6.5	1	9	0	0	0	1	41	0	rCDI	41	0	0	0	0	0	0	1	0	0	1	0	0	0	0	0	0	0	0	0	0
78	0	0.51	1	20	-2	1	5	4	2	2	1	0	1	26.11	3.7	0	4.32	0	0.3	0	45	1	0	0	0		1	Incomplete	90	1	0	0	0	1	0	0	0	0	0	0	0	0	0	0	0	0	0	0	0
84	0	0.58	1	11		0	6	4	6	4	0	0	1	28.93	3.7	0	10.07	0	6.5	1	28	1	1	0	0		1	Incomplete	90	0	0	0	0	0	0	0	0	0	0	0	0	0	0	1	0	0	0	0	0
84	1	0.63	1	4	6	1	2	2	1	1	0	0	0	24.17	4.1	0	8.01	0	0.8	1	29	1	1	0	0		1	Incomplete	90	0	0	0	0	0	0	0	0	0	0	0	0	0	0	0	0	0	0	0	0
54	0	0.52	1	41	-30	1	5	3	3	1	0	1	1	23.25					0.2	0	16	0	0	0	0		1	Death	15	0	0	0	0	0	0	0	0	0	0	0	0	0	0	0	0	0	1	0	0
86	1	0.57	1	19	-8	1	3	2	0	0	0	0	1	18.6					0.1	0	10	0	0	0	0		1	Death	90	0	0	0	0	0	0	0	0	0	0	0	0	0	0	0	0	0	0	1	0
80	0	0.45	1	4	1	1	3	2	0	0	0	0	1	32.03									0	0	0		1	Incomplete	90	0	0	0	0	0	0	1	0	0	0	0	0	0	0	1	0	0	0	0	0
81	0	0.61	1	6	0	1	4	3	1	1	1	0	1	27.3			4.49	0	0.5	1	14	0	1	0	0		1	Incomplete	90	0	0	0	0	0	0	0	0	0	0	0	0	0	0	0	0	0	0	1	0
84	0	0.51	1	4	3	1	3	3	2	2	0	0	0	25.4	3.7	0	5.1	0	0.2	0	15	0	1	0	0		1	Incomplete	90	0	0	0	0	0	0	0	0	0	0	0	0	0	0	0	0	0	0	0	0
33	1	0.63	1	27	-15	1	2	2	1	1	1	1	0	29.3	3.4	1	9.53	0	0.1	0			1	0	0		1	Incomplete	90	0	0	0	0	0	0	0	0	0	0	0	0	0	1	0	0	0	0	0	0
80	1	0.57	1	25	0	1	3	3	1	1	0	0	0	21.17	3.7	0							1	0	0		1	Incomplete	90	0	0	0	0	0	0	0	0	0	0	0	0	0	0	0	0	0	0	0	0
76	1	0.55	1	4		0	7	1	4	1	0	0	0	18.16	3.6	0	7.58	0	8.1	1	18	0	1	0	0		1	Incomplete	90	0	0	0	0	0	0	0	0	0	0	0	0	0	0	0	0	0	0	0	0
58	1	0.63	1	4		0	4	4	0	0	0	0	0	17.4	3.5	0	5.93	0	1.6	1	26	1	0	0	0		1	Incomplete	90	0	0	0	0	0	0	0	0	1	0	0	0	0	0	0	0	0	0	0	0
44	1	0.54	1	6	0	1	4	1	2	0	0	1	0	61.69	3.7	0	7.41	0	1.1	1	26	1	0	0	0		1	Incomplete	90	1	1	1	0	1	0	0	0	0	0	1	0	0	0	0	0	0	0	0	0
92	0	0.48	1	11	-1	1	5	3	1	1	0	0	0	21.3	2.5	1	10.96	0	0.6	1	2	0	0	0	0		1	Incomplete	90	0	0	0	0	0	0	0	0	0	0	0	0	0	0	0	0	0	0	0	0
72	1	0.39	1	6	1	1	1	1	0	0	0	0	0	19.7	2.6	1	3.25	0	0.5	1	128	1	0	0	0		1	Incomplete	12	0	0	0	0	0	0	0	0	0	0	0	1	0	0	0	0	0	0	1	0
83	0	0.45	1	18	0	1	7	2	0	0	0	0	1	26.6	3.8	0	9.22	0	1.5	1	59	1	0	0	0		1	Death	47	0	0	0	0	0	0	0	0	0	0	0	0	0	0	0	0	1	1	0	0
46	1	0.63	1	30	0	1	3	3	1	1	1	1	0	34.33	3.6	0	10.32	0	1.9	1	130	1	0	0	0		1	Incomplete	90	0	0	0	0	0	0	0	0	0	0	1	0	0	1	0	0	0	0	0	0
43	1	0.52	1	13	-7	1	4	2	0	0	0	0	1	42.39	3.8	0	9.64	0	2.7	1	55	1	0	0	0		1	Incomplete	47	0	0	0	0	0	0	0	0	0	0	0	0	0	0	0	0	0	0	0	0
61	1	0.64	1	11	-6	1	5	4	0	0	0	0	0	20.79	3.9	0	6.02	0	0.7	1	56	1	0	0	0		1	Incomplete	38	0	0	0	0	0	0	0	1	0	0	1	0	1	1	1	0	0	0	0	0
64	1	0.41	1	3	9	0	3	3	3	3	0	0	1	28.12	3.6	0	5.36	0	1.1	1	< 1	0	1	0	1	4	0	rCDI	4	0	0	0	0	0	0	0	0	0	0	0	0	0	0	0	0	0	0	0	0
89	0	0.46	1	4	18	0	4	4	1	1	0	0	0	28.1					0.6	1	109	1	1	0	1	14	0	rCDI	14	0	0	0	0	0	1	0	0	0	0	0	0	0	0	0	0	0	0	0	0
60	0	0.35	1	4	10	1	3	3	2	2	0	0	1	28.07	3	1	3.19	0	1	1	22	1	1	0	0		1	Incomplete	62	0	0	0	0	0	0	0	0	0	0	0	0	0	0	1	0	0	0	1	0
61	0	0.5	1	81	-49	1	4	4	2	2	1	0	0	34.11	3.4	1	9.35	0	2.3	1	76	1	1	0	0		1	Incomplete	51	1	0	0	0	1	0	0	0	0	0	1	0	0	0	0	0	0	0	0	0
71	0	0.53	1	74	-68	1	5	2	0	0	0	0	1	24.73	3.9	0	7.09	0	1.3	1	13	0	0	0	0		1	Incomplete	8	0	0	0	0	0	0	0	0	0	0	1	0	0	0	0	0	1	1	0	0
[truncated: 6 more columns]
